# Supplementary material for: Calcium carbonate particles: synthesis, temperature and time influence on the size, shape, phase, and their impact on cell hydroxyapatite formation
Source: Royal Society of Chemistry journal article supplement (doi:10.1039/d1tb01072g), 2021-01-01
Supplement: d1tb01072g1.pdf [file d1tb01072g1.pdf]

S1

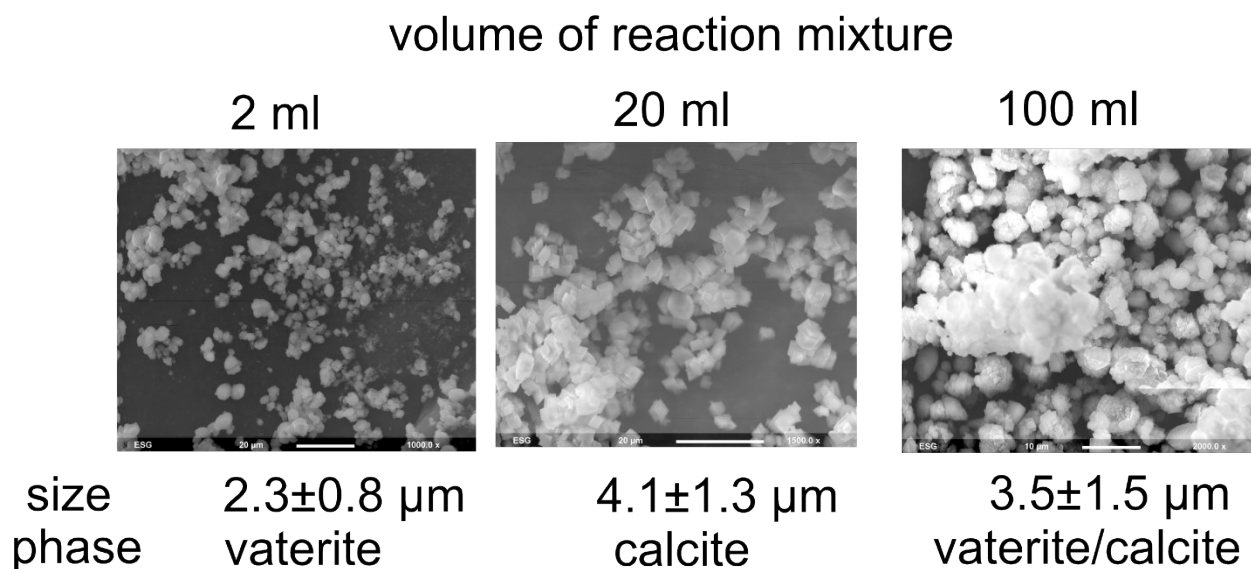

Figure S1 SEM images, average size and shape of the calcium carbonate particles prepared from various volume of reaction mixture, 1M  $\text{CaCl}_2$ , 1M  $\text{Na}_2\text{CO}_3$ , 30 min, 700 rpm, RT.

Typical samples

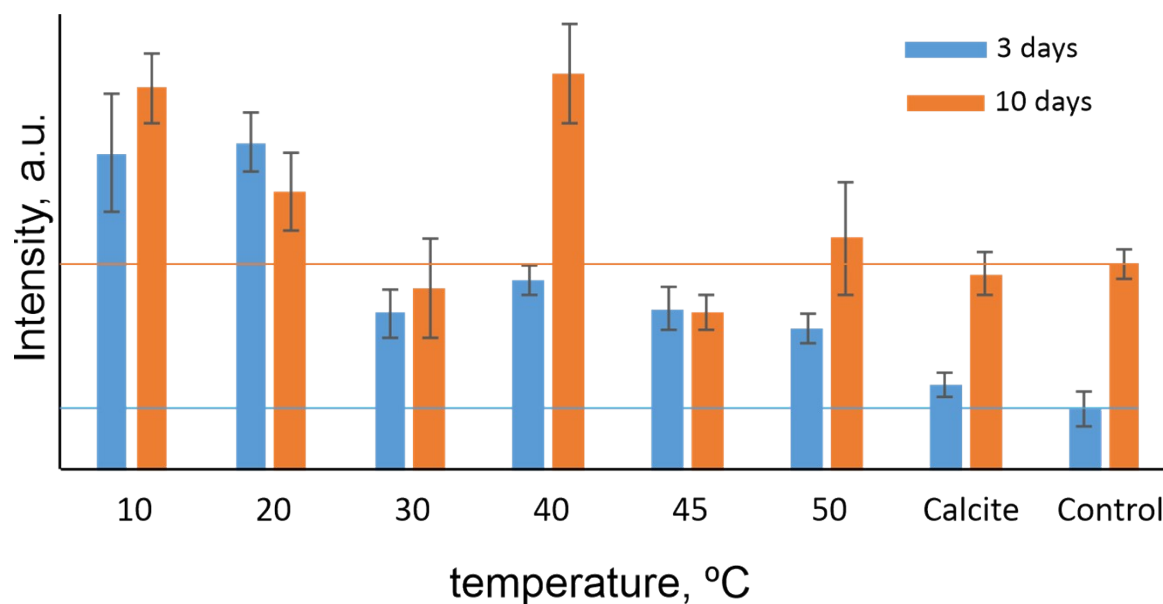

Figure S2 Hydroxyapatite deposition for samples obtained at different temperature, calcite samples and control cell on plastic surface.. Initial data for the figure 7b.
